# Supplementary material for: Distinct Contributions of the Peroxisome-Mitochondria Fission Machinery During Sexual Development of the Fungus Podospora anserina
Source: PubMed Central journal article supplement (PMC7175800; doi:10.3389/fmicb.2020.00640), 2020-04-15
Supplement: Data_Sheet_7.pdf [file Data_Sheet_7.pdf]

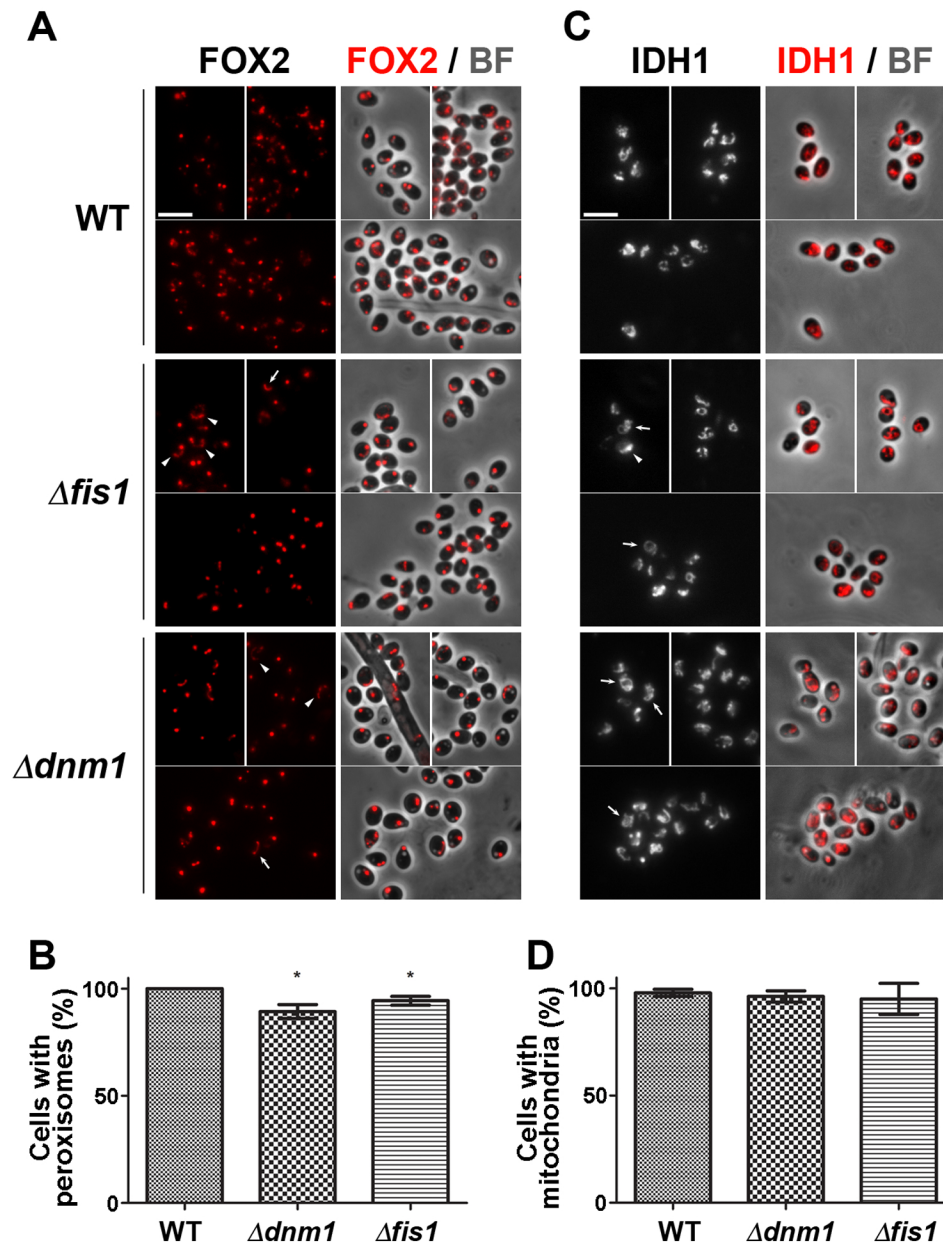

**Supplementary Figure 7.** Peroxisome and mitochondrial arrangement in spermatia. Analysis of peroxisomes (A-B) and mitochondria (C-D) in WT,  $\Delta fis1$  and  $\Delta dnm1$  spermatia. Epifluorescence microscopy analysis of peroxisomes (A) and mitochondria (C). Peroxisomes were visualized with FOX2-mCherry (WT and  $\Delta fis1$ ) or with FOX2-GFP ( $\Delta dnm1$ ) and were pseudocolored red. Mitochondria were labeled with IDH1-mCherry. Arrows show elongated organelles. Arrowheads in (A) show beads-on-a-string peroxisomal chains, and in (C) large mitochondria. BF: bright field. Scale bar, 5 $\mu$ m. Quantitation of spermatia containing peroxisomes (B) and mitochondria (D). Values are mean  $\pm$  SD of three independent experiments ( $n=300$ , \* $P<0.05$  by unpaired Student's t test).
