# Supplementary material for: Distinct Contributions of the Peroxisome-Mitochondria Fission Machinery During Sexual Development of the Fungus Podospora anserina
Source: PubMed Central journal article supplement (PMC7175800; doi:10.3389/fmicb.2020.00640), 2020-04-15
Supplement: Table_1.pdf [file Table_1.pdf]

**Supplementary Table 1.** *Podospora anserina* strains used in this research.

| Strain           | Genotype                                                              | Source                      |
|------------------|-----------------------------------------------------------------------|-----------------------------|
| S+ ( <i>Wt</i> ) | <i>mat+</i>                                                           | Rizet, 1952                 |
| S- ( <i>Wt</i> ) | <i>mat-</i>                                                           | Rizet, 1952                 |
| <i>ku70</i>      | $\Delta ku70::geneticinR$ <i>mat+</i>                                 | R. Debuchy*                 |
| GFP-PTS1         | <i>GFP-SKL::ble(EC)</i> <i>mat+</i>                                   | Ruprich-Robert, et al, 2002 |
| FS19             | <i>FOX2::mCherry</i> <i>mat-</i>                                      | Suaste-Olmos, et al, 2018   |
| FS20             | <i>FOX2::mCherry</i> <i>mat+</i>                                      | Suaste-Olmos, et al, 2018   |
| FS23             | <i>FOX2::GFP</i> <i>mat+</i>                                          | This study                  |
| FS24             | <i>FOX2::GFP</i> <i>mat-</i>                                          | This study                  |
| FS130            | <i>IDH1::mCherry</i> <i>mat+</i>                                      | This study                  |
| FS131            | <i>IDH1::mCherry</i> <i>mat-</i>                                      | This study                  |
| FS134            | <i>ATP9-7::mCherry(EC)</i> <i>mat+</i>                                | This study                  |
| LP206            | <i>FOX2::GFP ATP9-7::mCherry(EC)</i> <i>mat-</i>                      | This study                  |
| HT07             | $\Delta fis1::nat1$ 4D <i>mat+</i>                                    | This study                  |
| HT08             | $\Delta fis1::nat1$ 4D <i>mat-</i>                                    | This study                  |
| HT10             | $\Delta fis1::nat1$ 8B <i>mat+</i>                                    | This study                  |
| HT11             | $\Delta fis1::nat1$ <i>GFP-SKL::ble(EC)</i> <i>mat-</i>               | This study                  |
| HT12             | $\Delta fis1::nat1$ <i>GFP-SKL::ble(EC)</i> <i>mat+</i>               | This study                  |
| HT17             | $\Delta fis1::nat1$ <i>FOX2::mCherry GFP-SKL::ble(EC)</i> <i>mat-</i> | This study                  |
| HT18             | $\Delta fis1::nat1$ <i>FOX2::mCherry GFP-SKL::ble(EC)</i> <i>mat+</i> | This study                  |
| HT33             | $\Delta fis1::nat1$ <i>FOX2::mCherry</i> <i>mat+</i>                  | This study                  |
| HT34             | $\Delta fis1::nat1$ <i>FOX2::mCherry</i> <i>mat-</i>                  | This study                  |
| LP207            | $\Delta fis1::nat1$ <i>FOX2::GFP ATP9-7::mCherry(EC)</i> <i>mat+</i>  | This study                  |

|       |                                                                   |            |
|-------|-------------------------------------------------------------------|------------|
| HT35  | <i>Δfis1::nat1 FOX2::GFP ATP9-7::mCherry(EC) FIS1+(EC)-1 mat+</i> | This study |
| HT36  | <i>Δfis1::nat1 FOX2::GFP ATP9-7::mCherry(EC) FIS1+(EC)-6 mat+</i> | This study |
| FS132 | <i>Δfis1::nat1 FOX2::GFP mat+</i>                                 | This study |
| FS133 | <i>Δfis1::nat1 FOX2::GFP mat-</i>                                 | This study |
| RN1   | <i>FOX2::GFP IDH1::mCherry mat+</i>                               | This study |
| RN5   | <i>FOX2::GFP IDH1::mCherry mat-</i>                               | This study |
| RN10  | <i>Δdnm1::hph FOX2::GFP mat+</i>                                  | This study |
| RN11  | <i>Δdnm1::hph FOX2::GFP mat-</i>                                  | This study |
| RN13  | <i>Δdnm1::hph IDH1::mCherry mat-</i>                              | This study |
| RN14  | <i>Δdnm1::hph mat+</i>                                            | This study |
| RN15  | <i>Δdnm1::hph mat-</i>                                            | This study |
| RN16  | <i>Δdnm1::hph FOX2::GFP IDH1::mCherry mat+</i>                    | This study |
| RN17  | <i>Δdnm1::hph FOX2::GFP DNM1+(EC)-C1 mat+</i>                     | This study |
| RN23  | <i>Δdnm1::hph FOX2::GFP DNM1+(EC)-C5 mat+</i>                     | This study |
| RN18  | <i>Δdnm1::hph FOX2::GFP DNM1+(EC)-C9 mat+</i>                     | This study |
| RN19  | <i>Δdnm1::hph FOX2::GFP DNM1+(EC)-C11 mat+</i>                    | This study |
| RN20  | <i>Δdnm1::hph FOX2::GFP DNM1+(EC)-C12 mat+</i>                    | This study |
| RN21  | <i>Δdnm1::hph FOX2::GFP DNM1+(EC)-C13 mat+</i>                    | This study |
| RN22  | <i>Δdnm1::hph FOX2::GFP DNM1+(EC)-C14 mat+</i>                    | This study |
| RN24  | <i>Δdnm1::hph FOX2::GFP DNM1+(EC)-C21 mat+</i>                    | This study |
| RN25  | <i>Δdnm1::hph FOX2::GFP DNM1+(EC)-C31 mat+</i>                    | This study |

\*Kindly provided by Dr. Robert Debuchy, Institute for Integrative Biology of the Cell, CEA, CNRS, Univ. Paris-Sud, Université Paris-Saclay, France.

## References

Suaste-Olmos, F., Zirion-Martinez, C., Takano-Rojas, H., and Peraza-Reyes, L. (2018). Meiotic development initiation in the fungus *Podospora anserina* requires the peroxisome receptor export machinery. *Biochim Biophys Acta* 1865(4), 572-586.

Rizet G. (1952). Les phénomènes de barrage chez *Podospora anserina*. I. Analyse génétique des barrages entre souches S and s. *Rev Cytol Biol Veg* 13, 51-92.

Ruprich-Robert, G., Berteaux-Lecellier, V., Zickler, D., Panvier-Adoutte, A., and Picard, M. (2002). Identification of six loci in which mutations partially restore peroxisome biogenesis and/or alleviate the metabolic defect of *pex2* mutants in *Podospora*. *Genetics* 161(3), 1089-1099.
