# Supplementary material for: Distinct Contributions of the Peroxisome-Mitochondria Fission Machinery During Sexual Development of the Fungus Podospora anserina
Source: PubMed Central journal article supplement (PMC7175800; doi:10.3389/fmicb.2020.00640), 2020-04-15
Supplement: Table_2.pdf [file Table_2.pdf]

**Supplementary Table 2.** Oligonucleotide primers used in this research.

| Primer name | Primer sequence 5'>3'                 |
|-------------|---------------------------------------|
| Fis1-5F     | CTGCTTTTTGAAGGGGGCAGTGGAG             |
| Fis1-5R     | GAAGCATTATCAGGGTTGTCATGGTGGGCAAAAC    |
| Fis1-3F     | GTATTCAACATTTCCGTGGATAACGACAGCAAGGGC  |
| Fis1-3R     | CAGCAGCAACTTGCCTGATTGCCA              |
| Fis-NourF   | GTTTTGCCACCATGACAACCCTGATAAATGCTTC    |
| Fis-NourR   | GCCCTTGCTGTCGTTATCCACGGAAATGTTGAATAC  |
| Fis1-5ch-F  | GATTGTGTGGCGGATTAG                    |
| Fis1-3ch-R  | TATCATCCTTAGCGCGAA                    |
| Fis1-orf-F  | CGAGAACATGAAGTGCTT                    |
| Fis1-orf-R  | TTCGAAGCTTGAAGTTG                     |
| nour-Fb     | CGACATCTCATCTTCCTG                    |
| nour-Rc     | GTTGACGTTGGTGACCT                     |
| dnm1-5F     | CCTAAAGTTAGGTACTGGCAGCCAC             |
| dnm1-5R     | ATGATTCTTCTCGCTTCCGCAGGGCCACAAGAACT   |
| dnm1-3F     | CCTTCTTTCTAGCTAGAGGGGCTAGTTGGGCAAGTGG |
| dnm1-3R     | GTGTCTGGTGGGAGAGAATAGAACC             |
| dnm-hphF    | AGTTTCTTGTGGCCCTGCGGAAGCGAGAAGAATCAT  |
| dnm-hphR    | CCACTTGCCCAACTAGCCCCTCTAGCTAGAAAGAAGG |
| dnm1-5chF   | GGTAACTCAACTGGGTGCC                   |
| dnm1-5chR   | TCTGGGGCAGATCGAGAG                    |
| dnm1-3chF   | CACTGCAAGGACGTGGTT                    |
| dnm1-3chR   | AGAAGATGGCGTCGTTGC                    |
| hph-Rc      | GCGGTGAGTTCAGGCTTT                    |

|           |                                       |
|-----------|---------------------------------------|
| hph-Fc    | CGCCGATAGTGGAACCG                     |
| Fox2-F    | TTCCCCATTTCGATACCGAGTTCCC             |
| lkt-fox2  | TAAACCAGCACCGTCACCAAGCAACTCCGCCGCGGC  |
| fox-lkt   | GCCGCGGCGGAGTTGCTTGGTGACGGTGCTGGTTTA  |
| fox-hph   | CTAACATCATCACTTGAATTATTCCTTTGCCCTCGGA |
| fox2-3F   | TCCGAGGGCAAAGGAATAATTCAAGTGATGATGTTAG |
| fox2-3R   | AAATGTGCGACTGGGTAGGTAGTCT             |
| ldh1-F    | CATCATCCGTGAGAATACCGAGGGC             |
| lkt-idh1  | TAAACCAGCACCGTCACCCAACGAGTTCTCCATGGAG |
| idh-lkt   | CTCCATGGAGAACTCGTTGGGTGACGGTGCTGGTTTA |
| idh-hph   | CGTGTGTGGTTGGGTATCTTATTCCTTTGCCCTCGGA |
| idh1-3F   | TCCGAGGGCAAAGGAATAAGATACCCAACCACACACG |
| idh1-3R   | AAGAAACCCCTTGGCACTTCTAGCG             |
| pgpd-F    | AATTCTTCTAGAATCCCTTC                  |
| pgpd-R    | GCTTGCTAGAGGCGTTCATGGTTGCTGTTGGTGAAG  |
| mts-F     | CTTCACCAACAGCAACCATGAACGCCTCTAGCAAGC  |
| mts-R     | CTCCTCGCCCTTGCTCACGGCGGCCGTGGCAGTCTC  |
| mts-gfp-F | GAGACTGCCACGGCCGCCGTGAGCAAGGGCGAGGAG  |
| gfp-R     | CACCAAAACCATCATGTCTACTTGTACAGCTCGTCCA |
